# Supplementary material
Source: MDPI journal article supplement (https://www.mdpi.com/2075-163X/14/3/305)
Supplement: s1 [file s1]

# Supplementary Materials:

**Table S1.** Standard thermodynamic properties ( $\Delta G^\circ$ ) of monazite and xenotime at 25 °C and 1 bar, derived from calorimetric measurements. Other thermodynamic data (e.g.,  $\Delta H^\circ_f$ ,  $S^\circ$ ,  $V^\circ_m$ ) were reviewed by Pan et al. [13].

| Monazite          | $\Delta G^\circ_f$ (kJ mol <sup>-1</sup> ) | Xenotime          | $\Delta G^\circ_f$ (kJ mol <sup>-1</sup> ) |
|-------------------|--------------------------------------------|-------------------|--------------------------------------------|
| LaPO <sub>4</sub> | -1850.5 <sup>[17]</sup>                    | YPO <sub>4</sub>  | -1867.9 ± 1.7 <sup>[54]</sup>              |
|                   | -1861.2 <sup>[18]</sup>                    |                   | -1849.8 <sup>[11]</sup>                    |
|                   | -1850.5 ± 1.9 <sup>[15]</sup>              | DyPO <sub>4</sub> | -1829.1 <sup>[11]</sup>                    |
| CePO <sub>4</sub> | -1847.53 <sup>[10]</sup>                   | HoPO <sub>4</sub> | -1851.6 ± 3.4 <sup>[59]</sup>              |
|                   | -1849.8 <sup>[17]</sup>                    |                   | -1855.4 ± 2.1 <sup>[20]</sup>              |
|                   | -1849.9 ± 2.3 <sup>[15]</sup>              |                   | -1832.5 <sup>[11]</sup>                    |
| PrPO <sub>4</sub> | -1850.5 <sup>[17]</sup>                    | TmPO <sub>4</sub> | -1844 <sup>[58]</sup>                      |
|                   | -1855.6 <sup>[18]</sup>                    | YbPO <sub>4</sub> | -1809.8 ± 4.9 <sup>[55]</sup>              |
|                   | -1841.9 ± 3.3 <sup>[15]</sup>              |                   | -1808.4 <sup>[11]</sup>                    |
| NdPO <sub>4</sub> | -1851.8 ± 4.7 <sup>[51]</sup>              | LuPO <sub>4</sub> | -1835.4 ± 4.2 <sup>[53]</sup>              |
|                   | -1849.6 <sup>[17]</sup>                    |                   |                                            |
|                   | -1846.2 <sup>[18]</sup>                    |                   |                                            |
| SmPO <sub>4</sub> | -1848.4 ± 2.6 <sup>[15]</sup>              |                   |                                            |
|                   | -1839.5 <sup>[57]</sup>                    |                   |                                            |
|                   | -1846.9 <sup>[17]</sup>                    |                   |                                            |
| EuPO <sub>4</sub> | -1747.8 ± 2.8 <sup>[52]</sup>              |                   |                                            |
|                   | -1746 <sup>[18]</sup>                      |                   |                                            |
|                   | -1741.6 <sup>[17]</sup>                    |                   |                                            |
| GdPO <sub>4</sub> | -1741.6 ± 2.8 <sup>[15]</sup>              |                   |                                            |
|                   | -1844.47 <sup>[10]</sup>                   |                   |                                            |
|                   | -1840.8 <sup>[17]</sup>                    |                   |                                            |
|                   | -1840.8 ± 2.3 <sup>[15]</sup>              |                   |                                            |
|                   | -1844.3 ± 4.7 <sup>[56]</sup>              |                   |                                            |
